# Supplementary material for: Transcriptional Pathways Associated with Skeletal Muscle Changes after Spinal Cord Injury and Treadmill Locomotor Training
Source: Biomed Res Int. 2015 Aug 24;2015:387090. doi: 10.1155/2015/387090 (PMC4561307; doi:10.1155/2015/387090)
Supplement: Supplementary file 1 — The supplementary material provides the following:1- A table of the top five canonical pathways affected at each comparison point and a list of the genes included in these pathways which expression levels were significantly changed.2- A series of five tables containing, each individual gene's accession number, expanded name, and fold change, for each of the top 5 pathways at each comparison point. [file 387090.f1.xls]

## Sheet: Supp. Table 1
PATHWAY TABLE
SCI on day 3
Ingenuity Canonical Pathways	p-value	molecules
Protein Ubiquitination Pathway	7.94328e-12	PSMA3,UBE2A,PSMA7,USP5,UBE2L3,USP20,UBE2V2,PSMC5,USP8,UBE2B,PSMD10,PSMC2,PSMA2,UBE2J1,BIRC3,USP28,PSMA6,PSMB5,UBE4B,PSMC4,USP19,PSMD6,PSMD3,PSMB7,PSMD11,PSMB2,PSMD12,PSMA5,ANAPC5,PSMA4,PSMB1,HSP90AA1,PSMD1,PSMD4,VHL,UBE2I,PSMB3,B2M,USP14,PSMD7,PSMD9,USP11,CUL1,PSMB6,USO1,PSMC6,UBE2V1,USP47,PSMD14,PSMB4,PSMB9,PSMD13,MDM2,PSMD5,PSMA1,UBE3A,USP33,PSMD8,PSMC1,PSMD2,UBE2E2,PSMC3,ANAPC1
Mitochondrial Dysfunction	1e-10	MAP2K4,SDHB,NDUFB5,NDUFB8,COX7A2L,NDUFA2,NDUFB10,NDUFB9,NDUFA5,NDUFS1,SOD2,NDUFAB1,CYB5R3,UQCRFS1,NDUFB6,NDUFS2,OGDH,AIFM1,NDUFA8,ATP5J,SDHA,NDUFV1,COX17,NDUFB3,CASP3,NDUFS7,COX6C,NDUFV3,MAPK8,BACE1,SDHC,NDUFS3,ATP5C1,NDUFS5,PRDX3,NDUFS8,NDUFA11,NDUFA6,UQCRC2,NDUFB7,NDUFA12,CYCS (includes EG:54205),SDHD,NDUFA3,CYC1,NDUFB2,PSEN1
Oxidative Phosphorylation	1.20226e-10	ATP5D,UQCR11,TCIRG1,NDUFB5,ATP5L,NDUFB8,NDUFB10, NDUFA5,NDUFS1,ATP5G1,UQCRFS1,ATP5G3,NDUFA8,ATP5J,NDUFB3,NDUFS7,NDUFA10 (includes EG:678759), SDHC,ATP5C1,NDUFS5,PPA2,NDUFA6,NDUFB7,UQCRC2, NDUFA12,CYC1,NDUFB2,ATP6V0A4,SDHB,UQCRHL,COX7A2L,NDUFA2,NDUFB9,NDUFC2,NDUFAB1,NDUFS2,NDUFB6,SDHA,NDUFC1,NDUFV1,COX17,ATP5O,COX6C,NDUFV3,NDUFS3, ATP6V1E1,NDUFS8,NDUFA11,SDHD,NDUFA3,ATP6V1B2, NDUFA9 (includes EG:3…
Regulation of eIF4 and p70S6K Signaling	1.7378e-10	EIF1AY,EIF2S2,PIK3CA,MAPK1,SOS2,PPP2R5B,PDPK1,EIF2S1,EIF2B2,EIF4EBP1,MTOR,AKT1,EIF4G2,EIF3B,EIF3D,PPM1J, MKNK1,PAIP1,PPM1L,EIF3A,EIF2C1,MAP2K1,PABPC1,ITGB1, PIK3C2B,PPP2R5C,PPP2R5D,RAC1,PIK3C2G,EIF2B3,EIF3J, EIF4G3,EIF3E,EIF3G,PPP2CB,MAPK14,RRAS2,EIF3C,EIF4A1, EIF2B1,PIK3CB
Ubiquinone Biosynthesis	1.25893e-09	NDUFB5,NDUFB8,NDUFA2,BCKDHB,NDUFB10,NDUFB9,NDUFA5,NDUFS1,NDUFC2,NDUFAB1,NDUFS2,NDUFB6,NDUFA8,NDUFC1,NDUFV1,NDUFB3,NDUFS7,MGMT,METTL2B,COQ3, NDUFV3,NDUFA10 (includes EG:678759),NDUFS3,NDUFS5, NDUFS8,NDUFA11,NDUFA6,NDUFB7,PRMT5,NDUFA12, NDUFA3,NDUFB2
SCI8dTMvs NTM
Ingenuity Canonical Pathways	p-value	molecules
Protein Ubiquitination Pathway	0.000331131	PSMB3,PSMB5,PSMD7,UBE3A,PSMC5,PSMB7,PSMC1,CUL2,USP4,PSMD2,PSMB1,PARK2,PSMD4,ANAPC11,HLA-C
Amyloid Processing	0.0042658	PRKACB,CAPNS1,CSNK1D,NCSTN,BACE1,CSNK2B
BMP signaling pathway	0.00436516	PRKACB,JUN,FST,NRAS,BMP3,CREBBP,BMPR2
Role of BRCA1 in DNA Damage Response	0.00501187	FANCB,C17ORF70,FANCD2,BLM,CHEK2,CHEK1
Hereditary Breast Cancer Signaling	0.00630957	FANCB,C17ORF70,NRAS,FANCD2,CREBBP,BLM,CHEK2,HDAC5,CHEK1
SCI8d vs CTR
Ingenuity Canonical Pathways	p-value	molecules
Mitochondrial Dysfunction	3.16228e-12	HSD17B10,SDHB,PRDX5,CPT1B,NDUFB5,NDUFA2,NDUFA5, NDUFS1,SOD2,OGDH,AIFM1,NDUFA8,ATP5J,NDUFV1,COX6B1,NDUFV3,GSR,ATP5C1,COX8B,NDUFS8,NDUFA11,NDUFA6, CAT,UQCRC2,NDUFB7,SDHD,TXNRD2,NDUFA7
Valine, Leucine and Isoleucine Degradation	1.1749e-09	HSD17B10,ECHS1,ECH1,MUT,ACAA2,ACADS,HIBCH,HADHB,ACADL,ACADVL,HIBADH,ACAT1,OXCT1,MCCC1,HSD17B4, HADHA,HADH,MCCC2
Propanoate Metabolism	4.16869e-09	AASDH,ECHS1,ACSS1,ECH1,MUT,LDHB,ACADS,HIBCH, HADHB,ACADL,ACADVL,SUCLG1,ACAT1,MLYCD,HADHA, LDHA,ACSL1
Butanoate Metabolism	1.1749e-08	HSD17B10,SDHB,ECHS1,ECH1,LIPE,PDHA1 (includes EG:29554),ACADS,HADHB,BDH1,ACAT1,SDHD,OXCT1,HSD17B4,PDHB,HADH,HADHA
Pyruvate Metabolism	9.33254e-08	AKR7A2,ACSS1,ACOT9,MDH1,PDHA1 (includes EG:29554),LDHB,HADHB,NUDT7,PDHX,ACAT1,ACYP1,MDH2,PDHB,HADHA,LDHA,ACSL1,ADH4
SCI14vs CTR
Ingenuity Canonical Pathways	p-value	molecules
Mitochondrial Dysfunction	1.77828e-08	HSD17B10,ATP5J,COX7B,SDHB,COX17,APH1B,PRDX5,CPT1B,NDUFB4,GSR,COX8B,NDUFA11,NDUFA6,CAT,OGDH
Synthesis and Degradation of Ketone Bodies	5.37032e-05	HADHB,BDH1,ACAT1,OXCT1
Oxidative Phosphorylation	0.000125893	ATP5J,COX7B,SDHB,COX17,COX8B,UQCRHL,NDUFA11,UQCR11,TCIRG1,NDUFA6,NDUFB4
Citrate Cycle	0.000218776	SDHB,SUCLG1,IDH2,MDH1,OGDH
Ephrin Receptor Signaling	0.000398107	VEGFA,GNAS,MAP3K14,SRC,PAK1,PTPN11,SORBS1,CXCL12,VEGFB (includes EG:89811),JAK2,GNG5
SCI14TM vs NTM
Ingenuity Canonical Pathways	p-value	molecules
Estrogen Receptor Signaling	0.00501187	POLR2G,TAF9,SRA1,TAF6L,POLR2C,CDK7,CTBP2,HNRNPD,G6PC,MED14,H3F3C,GTF2H3
EIF2 Signaling	0.0154882	EIF2AK1,EIF1AX,EIF3F,EIF3D,PAIP1,EIF2B3,EIF4A2,EIF2C1,PPP1CA
Regulation of eIF4 and p70S6K Signaling	0.0251189	EIF1AY,PPP2CB,EIF1AX,PPP2CA,EIF3F,EIF3D,PAIP1,EIF2B3,EIF4A2,EIF2C1
Glutamate Metabolism	0.030903	GSR,GFPT1,GLS,CCDC92 (includes EG:80212),GCLM
Granzyme B Signaling	0.0363078	APAF1,LMNB1,DFFA
SCI14TM vs SCI8d
Ingenuity Canonical Pathways	p-value	molecules
Aminoacyl-tRNA Biosynthesis	2.04174e-06	CARS,RARS2,GARS,HARS,TARS,MARS,EPRS,FARSB,WARS2,EARS2,NARS,LARS,WARS,FARS2,KARS,AARS2
IL-6 Signaling	4.67735e-05	MAP2K6,MAP2K4,HSPB3,RAF1,ABCB1,HSPB2,SRF,MAP4K4,NFKB2,JAK2,STAT3,IL1R2,TRAF2,JUN,MAPK14,NFKBIA,PTPN11,MAP3K7,CSNK2A1,MAP2K3,CSNK2B,TNFRSF11B,HSPB1
EIF2 Signaling	0.00144544	EIF2AK1,EIF2S2,RAF1,RAC2,PIK3C2B,PIK3CA,RPS6,EIF2C2,EIF3J,EIF2B3,PDPK1,EIF4A2,EIF2S1,EIF4G2,EIF3C,EIF3D,EIF5,EIF4A1,EIF3A
NRF2-mediated Oxidative Stress Response	0.00186209	MAP2K6,MAP2K4,RAF1,PIK3CA,HSPB8,DNAJC3,DNAJB2 (includes EG:3300),DNAJA1,MAFG,JUN,MAP3K7,UBE2K,DNAJA2,TXN,DNAJB1,FKBP5,GSTK1,PIK3C2B,SOD1,DNAJB12,GSTO1,DNAJC11,MAPK14,STIP1,CAT,CCT7,MAP2K3,PRKCH,GSTO2,MAP2K5,MGST3,FTH1
Alanine and Aspartate Metabolism	0.00223872	ADSL,NARS,ACY3,ASRGL1,PDHX,DLD,KARS,AARS2,TASP1,ASL,PDHB,PDHA1 (includes EG:29554)
	Regulation of eIF4 and p70S6K Signaling	Regulation of eIF4 and p70S6K Signaling
	Ubiquinone Biosynthesis	Ubiquinone Biosynthesis

## Sheet: Supp. Table 2
SCI3d vs CTR		Affimetrix Accession No.	Gene description	Fold change
		Proteine ubiquitination
		1391768_at	similar to 26S protease regulatory subunit 6B (TAT-binding protein 7) (TBP-7) /// proteasome (prosome, macropain) 26S subunit, ATPase, 4	3.37056
		1372267_at	proteasome (prosome, macropain) 26S subunit, non-ATPase, 5	3.29851
		1388938_at	ubiquitin specific peptidase 5 (isopeptidase T)	3.07129
		1373163_at	ubiquitin specific peptidase 28	2.86024
		1376069_at	Proteasome (prosome, macropain) 26S subunit, non-ATPase, 11	2.75065
		1376069_at	Proteasome (prosome, macropain) 26S subunit, non-ATPase, 11	2.75065
		1388466_at	proteasome (prosome, macropain) 26S subunit, non-ATPase, 3	2.68881
		1398853_at	proteasome (prosome, macropain) subunit, beta type 3	2.57687
		1394082_at	proteasome (prosome, macropain) 26S subunit, non-ATPase, 14	2.33094
		1398786_at	proteasome (prosome, macropain) subunit, beta type 2	2.32553
		1387884_at	proteasome (prosome, macropain) subunit, alpha type 5	2.3207
		1389519_at	proteasome (prosome, macropain) 26S subunit, non-ATPase, 8	2.23162
		1371617_at	proteasome (prosome, macropain) 26S subunit, non-ATPase, 13	2.17788
		1367837_at	proteasome (prosome, macropain) subunit, alpha type 4	2.11566
		1373495_at	ubiquitin-conjugating enzyme E2, J1	2.09876
		1386930_at	proteasome (prosome, macropain) 26S subunit, non-ATPase, 4	2.08383
		1398856_at	proteasome (prosome, macropain) subunit, alpha type 2	2.06821
		1382385_at	proteasome (prosome, macropain) 26S subunit, ATPase, 6	1.99485
		1368507_at	proteasome (prosome, macropain) subunit, alpha type 3 /// proteasome subunit alpha type 3-like	1.98525
		1368507_at	proteasome (prosome, macropain) subunit, alpha type 3 /// proteasome subunit alpha type 3-like	1.98525
		1371869_at	proteasome (prosome, macropain) subunit, alpha type 7	1.9267
		1398792_at	proteasome (prosome, macropain) 26S subunit, ATPase, 1	1.91539
		1398858_at	proteasome (prosome, macropain) 26S subunit, non-ATPase, 2	1.89534
		1368184_at	proteasome (prosome, macropain) 26S subunit, non-ATPase, 9	1.88331
		1370113_at	baculoviral IAP repeat-containing 3	1.87054
		1399038_at	ubiquitin specific peptidase 19	1.83232
		1387120_at	proteasome (prosome, macropain) 26S subunit, ATPase 3	1.8168
		1367730_at	USO1 homolog, vesicle docking protein (yeast)	1.79279
		1372701_at	heat shock protein 90, alpha (cytosolic), class A member 1	1.77741
		1379322_at	proteasome (prosome, macropain) 26S subunit, non-ATPase, 7	1.75113
		1371944_at	ubiquitin-conjugating enzyme E2L 3	1.73703
		1388855_at	cullin 1	1.67176
		1399036_at	ubiquitin specific peptidase 47	1.64696
		1371851_at	proteasome (prosome, macropain) 26S subunit, non-ATPase, 6	1.63711
		1367711_at	proteasome (prosome, macropain) 26S subunit, ATPase 2	1.63606
		1367656_at	proteasome (prosome, macropain) subunit, beta type 7	1.62233
		1398777_at	proteasome (prosome, macropain) subunit, beta type 6	1.60287
		1398831_at	proteasome (prosome, macropain) subunit, beta type 4	1.60245
		1391770_at	Ubiquitin specific peptidase 33	1.60116
		1383073_at	ubiquitin specific peptidase 14	1.59668
		1384427_at	Mdm2 p53 binding protein homolog (mouse)	1.58497
		1388798_at	ubiquitin-conjugating enzyme E2E 2 (UBC4/5 homolog, yeast)	1.55266
		1369930_at	proteasome (prosome, macropain) subunit, alpha type 6	1.53989
		1374507_at	ubiquitination factor E4B	1.52541
		1398778_at	proteasome (prosome, macropain) subunit, alpha type 1	1.5057
		1368076_at	von Hippel-Lindau tumor suppressor	1.50193
		1373744_at	anaphase promoting complex subunit 1	1.49776
		1376656_at	ubiquitin specific peptidase 20	1.49678
		1392983_at	proteasome (prosome, macropain) 26S subunit, non-ATPase, 12	1.49307
		1370250_at	ubiquitin-conjugating enzyme E2I	1.49067
		1398812_at	proteasome (prosome, macropain) subunit, beta type 1	1.47991
		1367833_at	proteasome (prosome, macropain) 26S subunit, ATPase, 5	1.44821
		1371348_at	proteasome (prosome, macropain) subunit, beta type 5	1.42244
		1376576_at	dual specificity phosphatase 11 (RNA/RNP complex 1-interacting)	1.41291
		1372143_at	ubiquitin-conjugating enzyme E2 variant 2	1.37572
		1398897_at	ubiquitin-conjugating enzyme E2 variant 1	1.28022
		1391393_at	ubiquitin protein ligase E3A	1.24347
		1390027_at	ubiquitin specific peptidase 8	1.22346
		1388417_at	anaphase-promoting complex subunit 5	-1.28309
		1371440_at	Beta-2 microglobulin	-1.33253
		1387784_at	proteasome (prosome, macropain) 26S subunit, non-ATPase, 10	-1.36993
		1375642_at	ubiquitin-conjugating enzyme E2B, RAD6 homology (S. cerevisiae)	-1.55053
		1370186_at	proteasome (prosome, macropain) subunit, beta type 9 (large multifunctional peptidase 2)	-1.62547
		1392573_at	ubiquitin-conjugating enzyme E2A, RAD6 homolog (S. cerevisiae)	-1.88011
		Mitochondrial dysfunction
		1383701_at	mitogen activated protein kinase kinase 4	2.1332
		1370808_at	cytochrome b5 reductase 3	1.85347
		1379612_at	mitogen-activated protein kinase 8	1.65398
		1387690_at	caspase 3, apoptosis related cysteine protease	1.48543
		1376075_at	presenilin 1	1.32356
		1371701_at	NADH dehydrogenase (ubiquinone) 1 beta subcomplex, 9	-1.23855
		1371254_at	ubiquinol-cytochrome c reductase, Rieske iron-sulfur polypeptide 1	-1.25647
		1369984_at	cytochrome c oxidase, subunit XVII assembly protein homolog (S. cerevisiae)	-1.25728
		1389964_at	similar to Acyl carrier protein, mitochondrial precursor (ACP) (NADH-ubiquinone oxidoreductase 9.6 kDa subunit) (CI-SDAP) /// NADH dehydrogenase (ubiquinone) 1, alpha/beta subcomplex, 1	-1.2628
		1371482_at	NADH dehydrogenase (ubiquinone) Fe-S protein 2	-1.26816
		1371416_at	NADH dehydrogenase (ubiquinone) flavoprotein 1	-1.26932
		1386951_at	NADH dehydrogenase (ubiquinone) 1 alpha subcomplex 5	-1.27063
		1372123_at	succinate dehydrogenase complex, subunit B, iron sulfur (Ip)	-1.27199
		1389012_at	NADH dehydrogenase (ubiquinone) 1 beta subcomplex, 2	-1.34553
		1367591_at	peroxiredoxin 3	-1.3655
		1379243_at	NADH dehydrogenase (ubiquinone) 1 alpha subcomplex, 6 (B14)	-1.37833
		1373362_at	ubiquinol cytochrome c reductase core protein 2	-1.38645
		1371337_at	cytochrome c oxidase subunit VIIa polypeptide 2 like	-1.38792
		1370173_at	superoxide dismutase 2, mitochondrial	-1.3925
		1388414_at	NADH dehydrogenase (ubiquinone) Fe-S protein 5	-1.42066
		1367678_at	succinate dehydrogenase complex, subunit A, flavoprotein (Fp)	-1.42272
		1388489_at	NADH dehydrogenase (ubiquinone) 1 alpha subcomplex, 3	-1.42538
		1391126_at	NADH dehydrogenase (ubiquinone) 1 alpha subcomplex, 12	-1.42955
		1373041_at	NADH dehydrogenase (ubiquinone) 1 beta subcomplex 3	-1.44727
		1371342_at	cytochrome c-1	-1.47028
		1370767_at	cytochrome c oxidase subunit VIc-1	-1.48316
		1370918_a_at	ATP synthase, H+ transporting, mitochondrial F1 complex, gamma polypeptide 1	-1.50133
		1371346_at	NADH dehydrogenase (ubiquinone) 1 beta subcomplex, 6	-1.50937
		1370230_at	ATP synthase, H+ transporting, mitochondrial F0 complex, subunit F6	-1.52232
		1389288_at	NADH dehydrogenase (ubiquinone) 1 alpha subcomplex, 2	-1.52898
		1387773_at	cytochrome c, somatic	-1.53473
		1371912_at	NADH dehydrogenase (ubiquinone) Fe-S protein 7	-1.53993
		1371311_at	succinate dehydrogenase complex, subunit C, integral membrane protein	-1.55101
		1388361_at	NADH dehydrogenase (ubiquinone) 1 beta subcomplex, 10	-1.57423
		1388343_at	NADH dehydrogenase (ubiquinone) 1 beta subcomplex, 7	-1.61142
		1369256_at	beta-site APP cleaving enzyme 1	-1.62189
		1375220_at	NADH dehydrogenase (ubiquinone) 1 alpha subcomplex 11	-1.66641
		1370321_at	apoptosis-inducing factor, mitochondrion-associated 1	-1.71916
		1388326_at	NADH dehydrogenase (ubiquinone) Fe-S protein 8	-1.72948
		1388304_at	NADH dehydrogenase (ubiquinone) 1 beta subcomplex, 5	-1.76398
		1388364_at	NADH dehydrogenase (ubiquinone) Fe-S protein 3	-1.80123
		1375628_at	NADH dehydrogenase (ubiquinone) 1 beta subcomplex 8	-1.82064
		1390020_at	oxoglutarate (alpha-ketoglutarate) dehydrogenase (lipoamide)	-1.8763
		1388294_at	succinate dehydrogenase complex, subunit D, integral membrane protein	-1.9135
		1371355_at	NADH dehydrogenase (ubiquinone) 1 alpha subcomplex, 8	-1.99772
		1371577_at	NADH dehydrogenase (ubiquinone) Fe-S protein 1	-2.53968
		1368567_at	NADH dehydrogenase (ubiquinone) flavoprotein 3	-3.17809
		Oxidative Phosphorylation
		1371402_at	ATPase, H transporting, lysosomal V1 subunit B2	1.45743
		1380019_at	T-cell, immune regulator 1, ATPase, H+ transporting, lysosomal V0 subunit A3	1.34368
		1371335_at	ATP synthase, H+ transporting, mitochondrial F0 complex, subunit G	-1.1895
		1371701_at	NADH dehydrogenase (ubiquinone) 1 beta subcomplex, 9	-1.23855
		1371254_at	ubiquinol-cytochrome c reductase, Rieske iron-sulfur polypeptide 1	-1.25647
		1369984_at	cytochrome c oxidase, subunit XVII assembly protein homolog (S. cerevisiae)	-1.25728
		1389964_at	similar to Acyl carrier protein, mitochondrial precursor (ACP) (NADH-ubiquinone oxidoreductase 9.6 kDa subunit) (CI-SDAP) /// NADH dehydrogenase (ubiquinone) 1, alpha/beta subcomplex, 1	-1.2628
		1371482_at	NADH dehydrogenase (ubiquinone) Fe-S protein 2	-1.26816
		1371416_at	NADH dehydrogenase (ubiquinone) flavoprotein 1	-1.26932
		1386951_at	NADH dehydrogenase (ubiquinone) 1 alpha subcomplex 5	-1.27063
		1372123_at	succinate dehydrogenase complex, subunit B, iron sulfur (Ip)	-1.27199
		1367620_at	ATP synthase, H+ transporting, mitochondrial F0 complex, subunit C3 (subunit 9)	-1.31482
		1389012_at	NADH dehydrogenase (ubiquinone) 1 beta subcomplex, 2	-1.34553
		1370278_at	ATP synthase, H+ transporting, mitochondrial F1 complex, delta subunit	-1.34944
		1379243_at	NADH dehydrogenase (ubiquinone) 1 alpha subcomplex, 6 (B14)	-1.37833
		1373362_at	ubiquinol cytochrome c reductase core protein 2	-1.38645
		1371337_at	cytochrome c oxidase subunit VIIa polypeptide 2 like	-1.38792
		1388414_at	NADH dehydrogenase (ubiquinone) Fe-S protein 5	-1.42066
		1367678_at	succinate dehydrogenase complex, subunit A, flavoprotein (Fp)	-1.42272
		1388489_at	NADH dehydrogenase (ubiquinone) 1 alpha subcomplex, 3	-1.42538
		1391126_at	NADH dehydrogenase (ubiquinone) 1 alpha subcomplex, 12	-1.42955
		1370276_at	ATP synthase, H+ transporting, mitochondrial F1 complex, O subunit	-1.43815
		1373041_at	NADH dehydrogenase (ubiquinone) 1 beta subcomplex 3	-1.44727
		1371342_at	cytochrome c-1	-1.47028
		1370767_at	cytochrome c oxidase subunit VIc-1	-1.48316
		1370918_a_at	ATP synthase, H+ transporting, mitochondrial F1 complex, gamma polypeptide 1	-1.50133
		1371346_at	NADH dehydrogenase (ubiquinone) 1 beta subcomplex, 6	-1.50937
		1370230_at	ATP synthase, H+ transporting, mitochondrial F0 complex, subunit F6	-1.52232
		1389288_at	NADH dehydrogenase (ubiquinone) 1 alpha subcomplex, 2	-1.52898
		1371912_at	NADH dehydrogenase (ubiquinone) Fe-S protein 7	-1.53993
		1371564_at	ATPase, H+ transporting, lysosomal V1 subunit E1	-1.5428
		1371311_at	succinate dehydrogenase complex, subunit C, integral membrane protein	-1.55101
		1367599_at	ATP synthase, H+ transporting, mitochondrial F0 complex, subunit C1 (subunit 9)	-1.56764
		1388361_at	NADH dehydrogenase (ubiquinone) 1 beta subcomplex, 10	-1.57423
		1388343_at	NADH dehydrogenase (ubiquinone) 1 beta subcomplex, 7	-1.61142
		1375220_at	NADH dehydrogenase (ubiquinone) 1 alpha subcomplex 11	-1.66641
		1377576_at	pyrophosphatase (inorganic) 2	-1.72479
		1388326_at	NADH dehydrogenase (ubiquinone) Fe-S protein 8	-1.72948
		1392530_at	NADH dehydrogenase (ubiquinone) 1, subcomplex unknown, 1	-1.75308
		1388304_at	NADH dehydrogenase (ubiquinone) 1 beta subcomplex, 5	-1.76398
		1388364_at	NADH dehydrogenase (ubiquinone) Fe-S protein 3	-1.80123
		1375628_at	NADH dehydrogenase (ubiquinone) 1 beta subcomplex 8	-1.82064
		1396282_at	NADH dehydrogenase (ubiquinone) 1 alpha subcomplex, 9	-1.86787
		1389334_at	NADH dehydrogenase (ubiquinone) 1 alpha subcomplex 10 /// NADH dehydrogenase (ubiquinone) 1 alpha subcomplex 10-like 1	-1.87839
		1388294_at	succinate dehydrogenase complex, subunit D, integral membrane protein	-1.9135
		1371355_at	NADH dehydrogenase (ubiquinone) 1 alpha subcomplex, 8	-1.99772
		1375516_at	NADH dehydrogenase (ubiquinone) 1, subcomplex unknown, 2	-2.2127
		1371577_at	NADH dehydrogenase (ubiquinone) Fe-S protein 1	-2.53968
		1379741_at	ATPase, H+ transporting, lysosomal V0 subunit A4	-2.89592
		1368567_at	NADH dehydrogenase (ubiquinone) flavoprotein 3	-3.17809
		Regulation of eIF4 and p70S6K Signaling
		1382058_at	related RAS viral (r-ras) oncogene homolog 2	3.24011
		1371936_at	eukaryotic translation initiation factor 4A1	2.24176
		1387847_at	phosphoinositide-3-kinase, catalytic, beta polypeptide	2.15336
		1388576_at	eukaryotic translation initiation factor 3, subunit 9 (eta)	1.9261
		1379485_at	eukaryotic translation initiation factor 3, subunit 10 (theta)	1.86241
		1386888_at	eukaryotic translation initiation factor 4E binding protein 1	1.85198
		1367827_at	protein phosphatase 2 (formerly 2A), catalytic subunit, beta isoform	1.83991
		1369952_at	poly(A) binding protein, cytoplasmic 1	1.82754
		1381576_at	phosphoinositide-3-kinase, class 2, beta polypeptide	1.82259
		1368967_at	eukaryotic translation initiation factor 2B, subunit 3 gamma	1.81161
		1387346_at	integrin beta 1 (fibronectin receptor beta)	1.70659
		1373384_at	Protein phosphatase 2, regulatory subunit B' gamma isoform	1.6701
		1367713_at	eukaryotic translation initiation factor 2, subunit 1 alpha	1.6673
		1367760_at	mitogen activated protein kinase kinase 1	1.66042
		1388568_at	eukaryotic translation initiation factor 3, subunit D	1.65872
		1374397_at	eukaryotic translation initiation factor 2, subunit 2 (beta)	1.63714
		1370311_at	eukaryotic translation initiation factor 2B, subunit 1 alpha	1.6039
		1379335_at	poly(A) binding protein interacting protein 1	1.5821
		1370052_at	3-phosphoinositide dependent protein kinase-1	1.48314
		1368019_at	FK506 binding protein 12-rapamycin associated protein 1	1.39061
		1388378_at	eukaryotic translation initiation factor 3, subunit C	1.35975
		1397520_at	eukaryotic translation initiation factor 4, gamma 2	1.35089
		1373364_at	eukaryotic translation initiation factor 4 gamma, 3	1.35058
		1372513_at	ras-related C3 botulinum toxin substrate 1	1.33869
		1367714_at	eukaryotic translation initiation factor 2B, subunit 2 beta	1.32437
		1388424_at	eukaryotic translation initiation factor 3, subunit J	1.28879
		1374232_at	phosphatidylinositol 3-kinase, catalytic, alpha polypeptide	1.24585
		1388381_at	eukaryotic translation initiation factor 3, subunit G	1.20309
		1371973_at	eukaryotic translation initiation factor 3, subunit E	1.14025
		1367697_at	mitogen activated protein kinase 14	-1.27728
		1374968_at	eukaryotic translation initiation factor 2C, 1	-1.34913
		1369078_at	mitogen activated protein kinase 1	-1.36106
		1383126_at	V-akt murine thymoma viral oncogene homolog 1	-1.45921
		1376489_at	son of sevenless homolog 2 (Drosophila)	-1.46618
		1395502_at	protein phosphatase 2, regulatory subunit B', delta isoform	-1.46915
		1377235_a_at	protein phosphatase 2, regulatory subunit B', beta isoform	-1.51421
		1374550_at	MAP kinase-interacting serine/threonine kinase 1	-1.66133
		1374310_at	protein phosphatase 1J	-1.66183
		1376584_at	protein phosphatase 1 (formerly 2C)-like	-2.18969
		1369050_at	phosphoinositide-3-kinase, class 2, gamma polypeptide	-9.04672
		Ubiquinone Biosynthesis
		1374424_at	protein arginine methyltransferase 5	2.0477
		1371701_at	NADH dehydrogenase (ubiquinone) 1 beta subcomplex, 9	-1.23855
		1389964_at	similar to Acyl carrier protein, mitochondrial precursor (ACP) (NADH-ubiquinone oxidoreductase 9.6 kDa subunit) (CI-SDAP) /// NADH dehydrogenase (ubiquinone) 1, alpha/beta subcomplex, 1	-1.2628
		1371482_at	NADH dehydrogenase (ubiquinone) Fe-S protein 2	-1.26816
		1371416_at	NADH dehydrogenase (ubiquinone) flavoprotein 1	-1.26932
		1386951_at	NADH dehydrogenase (ubiquinone) 1 alpha subcomplex 5	-1.27063
		1389012_at	NADH dehydrogenase (ubiquinone) 1 beta subcomplex, 2	-1.34553
		1379243_at	NADH dehydrogenase (ubiquinone) 1 alpha subcomplex, 6 (B14)	-1.37833
		1388414_at	NADH dehydrogenase (ubiquinone) Fe-S protein 5	-1.42066
		1388489_at	NADH dehydrogenase (ubiquinone) 1 alpha subcomplex, 3	-1.42538
		1391126_at	NADH dehydrogenase (ubiquinone) 1 alpha subcomplex, 12	-1.42955
		1373041_at	NADH dehydrogenase (ubiquinone) 1 beta subcomplex 3	-1.44727
		1376489_at	son of sevenless homolog 2 (Drosophila)	-1.46618
		1395502_at	protein phosphatase 2, regulatory subunit B', delta isoform	-1.46915
		1371346_at	NADH dehydrogenase (ubiquinone) 1 beta subcomplex, 6	-1.50937
		1377235_a_at	protein phosphatase 2, regulatory subunit B', beta isoform	-1.51421
		1389288_at	NADH dehydrogenase (ubiquinone) 1 alpha subcomplex, 2	-1.52898
		1371912_at	NADH dehydrogenase (ubiquinone) Fe-S protein 7	-1.53993
		1388361_at	NADH dehydrogenase (ubiquinone) 1 beta subcomplex, 10	-1.57423
		1388343_at	NADH dehydrogenase (ubiquinone) 1 beta subcomplex, 7	-1.61142
		1370906_at	branched chain keto acid dehydrogenase E1, beta polypeptide	-1.63287
		1374550_at	MAP kinase-interacting serine/threonine kinase 1	-1.66133
		1374310_at	protein phosphatase 1J	-1.66183
		1375220_at	NADH dehydrogenase (ubiquinone) 1 alpha subcomplex 11	-1.66641
		1388326_at	NADH dehydrogenase (ubiquinone) Fe-S protein 8	-1.72948
		1392530_at	NADH dehydrogenase (ubiquinone) 1, subcomplex unknown, 1	-1.75308
		1388304_at	NADH dehydrogenase (ubiquinone) 1 beta subcomplex, 5	-1.76398
		1388364_at	NADH dehydrogenase (ubiquinone) Fe-S protein 3	-1.80123
		1375628_at	NADH dehydrogenase (ubiquinone) 1 beta subcomplex 8	-1.82064
		1389334_at	NADH dehydrogenase (ubiquinone) 1 alpha subcomplex 10 /// NADH dehydrogenase (ubiquinone) 1 alpha subcomplex 10-like 1	-1.87839
		1371355_at	NADH dehydrogenase (ubiquinone) 1 alpha subcomplex, 8	-1.99772
		1368311_at	O-6-methylguanine-DNA methyltransferase	-2.11381
		1376584_at	protein phosphatase 1 (formerly 2C)-like	-2.18969
		1375516_at	NADH dehydrogenase (ubiquinone) 1, subcomplex unknown, 2	-2.2127
		1367818_at	coenzyme Q3 homolog, methyltransferase (S. cerevisiae)	-2.45894
		1371577_at	NADH dehydrogenase (ubiquinone) Fe-S protein 1	-2.53968
		1368567_at	NADH dehydrogenase (ubiquinone) flavoprotein 3	-3.17809
		1369050_at	phosphoinositide-3-kinase, class 2, gamma polypeptide	-9.04672

## Sheet: Supp. Table 3
SCI 8 day vs CTR
SCI8d vs CTR		Affimetrix Accession No.	Gene description	Fold change
		Mitochondrial Dysfunction
		1370321_at	apoptosis-inducing factor, mitochondrion-associated 1	-1.25444
		1375411_at	NADH dehydrogenase (ubiquinone) 1 alpha subcomplex, 7 (B14.5a)	-1.2627
		1371321_at	cytochrome c oxidase, subunit VIb polypeptide 1	-1.30988
		1388294_at	succinate dehydrogenase complex, subunit D, integral membrane protein	-1.35473
		1371416_at	NADH dehydrogenase (ubiquinone) flavoprotein 1	-1.43058
		1370918_a_at	ATP synthase, H+ transporting, mitochondrial F1 complex, gamma polypeptide 1	-1.43729
		1370173_at	superoxide dismutase 2, mitochondrial	-1.45081
		1389288_at	NADH dehydrogenase (ubiquinone) 1 alpha subcomplex, 2	-1.45255
		1386951_at	NADH dehydrogenase (ubiquinone) 1 alpha subcomplex 5	-1.48387
		1379243_at	NADH dehydrogenase (ubiquinone) 1 alpha subcomplex, 6 (B14)	-1.48918
		1371355_at	NADH dehydrogenase (ubiquinone) 1 alpha subcomplex, 8	-1.50657
		1370230_at	ATP synthase, H+ transporting, mitochondrial F0 complex, subunit F6	-1.51136
		1367739_at	cytochrome c oxidase, subunit 8B	-1.51732
		1373362_at	ubiquinol cytochrome c reductase core protein 2	-1.53372
		1372123_at	succinate dehydrogenase complex, subunit B, iron sulfur (Ip)	-1.54371
		1388304_at	NADH dehydrogenase (ubiquinone) 1 beta subcomplex, 5	-1.56486
		1367677_at	peroxiredoxin 5	-1.57544
		1369061_at	glutathione reductase	-1.58845
		1388326_at	NADH dehydrogenase (ubiquinone) Fe-S protein 8	-1.60903
		1388343_at	NADH dehydrogenase (ubiquinone) 1 beta subcomplex, 7	-1.62312
		1390020_at	oxoglutarate (alpha-ketoglutarate) dehydrogenase (lipoamide)	-1.69389
		1375220_at	NADH dehydrogenase (ubiquinone) 1 alpha subcomplex 11	-1.70303
		1367662_at	hydroxysteroid (17-beta) dehydrogenase 10	-1.7133
		1371577_at	NADH dehydrogenase (ubiquinone) Fe-S protein 1	-1.93861
		1368309_at	thioredoxin reductase 2	-2.04095
		1367763_at	acetyl-coenzyme A acetyltransferase 1	-2.06586
		1367742_at	carnitine palmitoyltransferase 1b, muscle	-2.12483
		1368567_at	NADH dehydrogenase (ubiquinone) flavoprotein 3	-2.39845
		Valine, Leucine and Isoleucine Degradation
		1367672_at	hydroxysteroid (17-beta) dehydrogenase 4	-1.48605
		1388118_at	3-hydroxyisobutyrate dehydrogenase	-1.49367
		1367735_at	acyl-Coenzyme A dehydrogenase, long-chain	-1.5245
		1377060_at	methylcrotonoyl-Coenzyme A carboxylase 2 (beta)	-1.67536
		1367694_at	hydroxyacyl-Coenzyme A dehydrogenase/3-ketoacyl-Coenzyme A thiolase/enoyl-Coenzyme A hydratase (trifunctional protein), beta subunit	-1.70611
		1367694_at	hydroxyacyl-Coenzyme A dehydrogenase/3-ketoacyl-Coenzyme A thiolase/enoyl-Coenzyme A hydratase (trifunctional protein), beta subunit	-1.70611
		1367662_at	hydroxysteroid (17-beta) dehydrogenase 10	-1.7133
		1376852_at	methylcrotonoyl-Coenzyme A carboxylase 1 (alpha)	-1.72605
		1373564_at	3-hydroxyisobutyryl-Coenzyme A hydrolase	-1.80079
		1370164_at	hydroxyacyl-Coenzyme A dehydrogenase/3-ketoacyl-Coenzyme A thiolase/enoyl-Coenzyme A hydratase (trifunctional protein), alpha subunit	-1.88228
		1367897_at	acyl-Coenzyme A dehydrogenase, very long chain	-1.88874
		1367763_at	acetyl-coenzyme A acetyltransferase 1	-2.06586
		1367829_at	enoyl Coenzyme A hydratase, short chain, 1, mitochondrial	-2.21123
		1393152_at	methylmalonyl-Coenzyme A mutase	-2.26214
		1367828_at	acyl-Coenzyme A dehydrogenase, C-2 to C-3 short chain	-2.27117
		1386880_at	acetyl-Coenzyme A acyltransferase 2	-2.54856
		1371421_at	3-oxoacid CoA transferase 1	-2.5617
		1386885_at	enoyl coenzyme A hydratase 1, peroxisomal	-2.9589
		Propanoate Metabolism
		1367586_at	lactate dehydrogenase A	1.55757
		1367735_at	acyl-Coenzyme A dehydrogenase, long-chain	-1.5245
		1367642_at	succinate-CoA ligase, alpha subunit	-1.5848
		1367694_at	hydroxyacyl-Coenzyme A dehydrogenase/3-ketoacyl-Coenzyme A thiolase/enoyl-Coenzyme A hydratase (trifunctional protein), beta subunit	-1.70611
		1374981_at	aminoadipate-semialdehyde dehydrogenase	-1.76995
		1373564_at	3-hydroxyisobutyryl-Coenzyme A hydrolase	-1.80079
		1370164_at	hydroxyacyl-Coenzyme A dehydrogenase/3-ketoacyl-Coenzyme A thiolase/enoyl-Coenzyme A hydratase (trifunctional protein), alpha subunit	-1.88228
		1367897_at	acyl-Coenzyme A dehydrogenase, very long chain	-1.88874
		1370218_at	lactate dehydrogenase B	-1.94342
		1367763_at	acetyl-coenzyme A acetyltransferase 1	-2.06586
		1367829_at	enoyl Coenzyme A hydratase, short chain, 1, mitochondrial	-2.21123
		1393152_at	methylmalonyl-Coenzyme A mutase	-2.26214
		1367828_at	acyl-Coenzyme A dehydrogenase, C-2 to C-3 short chain	-2.27117
		1370939_at	acyl-CoA synthetase long-chain family member 1	-2.33513
		1386885_at	enoyl coenzyme A hydratase 1, peroxisomal	-2.9589
		1367638_at	malonyl-CoA decarboxylase	-4.34078
		1372162_at	acyl-CoA synthetase short-chain family member 1	-6.28059
		Butanoate Metabolism
		1371380_at	pyruvate dehydrogenase (lipoamide) alpha 1	-1.29367
		1388294_at	succinate dehydrogenase complex, subunit D, integral membrane protein	-1.35473
		1367672_at	hydroxysteroid (17-beta) dehydrogenase 4	-1.48605
		1371388_at	pyruvate dehydrogenase (lipoamide) beta	-1.52866
		1372123_at	succinate dehydrogenase complex, subunit B, iron sulfur (Ip)	-1.54371
		1367694_at	hydroxyacyl-Coenzyme A dehydrogenase/3-ketoacyl-Coenzyme A thiolase/enoyl-Coenzyme A hydratase (trifunctional protein), beta subunit	-1.70611
		1367694_at	hydroxyacyl-Coenzyme A dehydrogenase/3-ketoacyl-Coenzyme A thiolase/enoyl-Coenzyme A hydratase (trifunctional protein), beta subunit	-1.70611
		1367662_at	hydroxysteroid (17-beta) dehydrogenase 10	-1.7133
		1370164_at	hydroxyacyl-Coenzyme A dehydrogenase/3-ketoacyl-Coenzyme A thiolase/enoyl-Coenzyme A hydratase (trifunctional protein), alpha subunit	-1.88228
		1367763_at	acetyl-coenzyme A acetyltransferase 1	-2.06586
		1367829_at	enoyl Coenzyme A hydratase, short chain, 1, mitochondrial	-2.21123
		1367828_at	acyl-Coenzyme A dehydrogenase, C-2 to C-3 short chain	-2.27117
		1387132_at	lipase, hormone sensitive	-2.39617
		1371421_at	3-oxoacid CoA transferase 1	-2.5617
		1386885_at	enoyl coenzyme A hydratase 1, peroxisomal	-2.9589
		1368387_at	3-hydroxybutyrate dehydrogenase, type 1	-6.67084
		Pyruvate Metabolism
		1367586_at	lactate dehydrogenase A	1.55757
		1379262_at	acyl-CoA thioesterase 9	1.33009
		1371470_at	alcohol dehydrogenase 4 (class II), pi polypeptide /// alcohol dehydrogenase 5	-1.28439
		1371380_at	pyruvate dehydrogenase (lipoamide) alpha 1	-1.29367
		1398429_at	pyruvate dehydrogenase complex, component X	-1.37918
		1369927_at	malate dehydrogenase 2, NAD (mitochondrial)	-1.49457
		1367653_a_at	malate dehydrogenase 1, NAD (soluble)	-1.52635
		1371388_at	pyruvate dehydrogenase (lipoamide) beta	-1.52866
		1367843_at	aldo-keto reductase family 7, member A2 (aflatoxin aldehyde reductase)	-1.69296
		1367694_at	hydroxyacyl-Coenzyme A dehydrogenase/3-ketoacyl-Coenzyme A thiolase/enoyl-Coenzyme A hydratase (trifunctional protein), beta subunit	-1.70611
		1370164_at	hydroxyacyl-Coenzyme A dehydrogenase/3-ketoacyl-Coenzyme A thiolase/enoyl-Coenzyme A hydratase (trifunctional protein), alpha subunit	-1.88228
		1373448_at	acylphosphatase 1, erythrocyte (common) type	-1.94212
		1370218_at	lactate dehydrogenase B	-1.94342
		1367763_at	acetyl-coenzyme A acetyltransferase 1	-2.06586
		1370939_at	acyl-CoA synthetase long-chain family member 1	-2.33513
		1389251_at	nudix (nucleoside diphosphate linked moiety X)-type motif 7	-2.40989
		1372162_at	acyl-CoA synthetase short-chain family member 1	-6.28059

## Sheet: Supp. Table 4
SCI14d vs CTR		Affimetrix Accession No.	Gene description	Fold change
		Mitochondrial Dysfunction
		1388440_at	anterior pharynx defective 1 homolog B (C. elegans)	1.46514
		1371371_at	NADH dehydrogenase (ubiquinone) 1 beta subcomplex 4	-1.3029
		1369984_at	cytochrome c oxidase, subunit XVII assembly protein homolog (S. cerevisiae)	-1.41183
		1371387_at	cytochrome c oxidase subunit VIIb	-1.42796
		1370230_at	ATP synthase, H+ transporting, mitochondrial F0 complex, subunit F6	-1.43927
		1379243_at	NADH dehydrogenase (ubiquinone) 1 alpha subcomplex, 6 (B14)	-1.47634
		1367739_at	cytochrome c oxidase, subunit 8B	-1.49372
		1390020_at	oxoglutarate (alpha-ketoglutarate) dehydrogenase (lipoamide)	-1.52892
		1367677_at	peroxiredoxin 5	-1.55572
		1367662_at	hydroxysteroid (17-beta) dehydrogenase 10	-1.56277
		1372123_at	succinate dehydrogenase complex, subunit B, iron sulfur (Ip)	-1.61097
		1369061_at	glutathione reductase	-1.64278
		1375220_at	NADH dehydrogenase (ubiquinone) 1 alpha subcomplex 11	-1.69077
		1367742_at	carnitine palmitoyltransferase 1b, muscle	-1.70315
		1367763_at	acetyl-coenzyme A acetyltransferase 1	-1.98364
		Synthesis and Degradation of Ketone Bodies
		1367694_at	hydroxyacyl-Coenzyme A dehydrogenase/3-ketoacyl-Coenzyme A thiolase/enoyl-Coenzyme A hydratase (trifunctional protein), beta subunit	-1.68644
		1367763_at	acetyl-coenzyme A acetyltransferase 1	-1.98364
		1371421_at	3-oxoacid CoA transferase 1	-2.54639
		1368387_at	3-hydroxybutyrate dehydrogenase, type 1	-7.26186
		Oxidative Phosphorylation
		1380019_at	T-cell, immune regulator 1, ATPase, H+ transporting, lysosomal V0 subunit A3	1.32978
		1371371_at	NADH dehydrogenase (ubiquinone) 1 beta subcomplex 4	-1.3029
		1369984_at	cytochrome c oxidase, subunit XVII assembly protein homolog (S. cerevisiae)	-1.41183
		1371387_at	cytochrome c oxidase subunit VIIb	-1.42796
		1370230_at	ATP synthase, H+ transporting, mitochondrial F0 complex, subunit F6	-1.43927
		1379243_at	NADH dehydrogenase (ubiquinone) 1 alpha subcomplex, 6 (B14)	-1.47634
		1367739_at	cytochrome c oxidase, subunit 8B	-1.49372
		1372123_at	succinate dehydrogenase complex, subunit B, iron sulfur (Ip)	-1.61097
		1375220_at	NADH dehydrogenase (ubiquinone) 1 alpha subcomplex 11	-1.69077
		Citrate Cycle
		1367642_at	succinate-CoA ligase, alpha subunit	-1.5164
		1390020_at	oxoglutarate (alpha-ketoglutarate) dehydrogenase (lipoamide)	-1.52892
		1372123_at	succinate dehydrogenase complex, subunit B, iron sulfur (Ip)	-1.61097
		1388403_at	isocitrate dehydrogenase 2 (NADP+), mitochondrial	-1.68557
		1372790_at	Malate dehydrogenase 1, NAD (soluble)	-2.97186
		Ephrin Receptor Signaling
		1387377_a_at	p21 (CDKN1A)-activated kinase 1	3.93252
		1387906_a_at	GNAS complex locus	2.49938
		1391688_at	mitogen-activated protein kinase kinase kinase 14	2.33761
		1368856_at	Janus kinase 2	2.21642
		1373124_at	V-src sarcoma (Schmidt-Ruppin A-2) viral oncogene homolog (avian)	1.95856
		1387342_at	guanine nucleotide binding protein (G protein), gamma 5	-1.27768
		1388379_at	Protein tyrosine phosphatase, non-receptor type 11	-1.42058
		1373807_at	vascular endothelial growth factor A	-1.44875
		1375349_at	sorbin and SH3 domain containing 1	-1.72625
		1388583_at	chemokine (C-X-C motif) ligand 12 (stromal cell-derived factor 1)	-1.85068
		1380854_at	vascular endothelial growth factor B	-2.09278

## Sheet: Supp. Table 5
SCI8d+TM vs SCI8d		Affimetrix Accession No.	Gene description	Fold change
		Protein ubiquitination
		1382741_at	ubiquitin protein ligase E3A	1.12294
		1367482_at	anaphase promoting complex subunit 11 homolog (yeast)	-1.10645
		1379322_at	proteasome (prosome, macropain) 26S subunit, non-ATPase, 7	-1.14781
		1398858_at	proteasome (prosome, macropain) 26S subunit, non-ATPase, 2	-1.16664
		1386930_at	proteasome (prosome, macropain) 26S subunit, non-ATPase, 4	-1.18493
		1389016_at	ubiquitin specific peptidase 4 (proto-oncogene)	-1.18553
		1398812_at	proteasome (prosome, macropain) subunit, beta type 1	-1.19207
		1371348_at	proteasome (prosome, macropain) subunit, beta type 5	-1.19829
		1367656_at	proteasome (prosome, macropain) subunit, beta type 7	-1.20181
		1398792_at	proteasome (prosome, macropain) 26S subunit, ATPase, 1	-1.20214
		1378127_at	cullin 2	-1.207
		1367833_at	proteasome (prosome, macropain) 26S subunit, ATPase, 5	-1.21403
		1369138_a_at	Parkinson disease (autosomal recessive, juvenile) 2, parkin	-1.2847
		1398853_at	proteasome (prosome, macropain) subunit, beta type 3	-1.30577
		Amyloid processing
		1384772_at	protein kinase, cAMP dependent, catalytic, beta	1.25427
		1396543_at	nicastrin	1.2522
		1370527_a_at	casein kinase 1, delta	-1.0954
		1367462_at	calpain, small subunit 1	-1.16811
		1387108_at	casein kinase 2, beta subunit	-1.22944
		1369256_at	beta-site APP cleaving enzyme 1	-1.40453
		BMP signaling pathway
		1376843_at	bone morphogenetic protein receptor, type II (serine/threonine kinase)	1.60055
		1389528_s_at	Jun oncogene	1.52356
		1387678_at	neuroblastoma ras oncogene	1.27755
		1384772_at	protein kinase, cAMP dependent, catalytic, beta	1.25427
		1382264_at	CREB binding protein	-1.22635
		1387843_at	follistatin	-1.88611
		1369773_at	bone morphogenetic protein 3	-2.35118
		Role of BRCA1 in DNA Damage Response
		1378240_at	Fanconi anemia, complementation group D2	1.75799
		1377718_at	Fanconi anemia, complementation group B	1.59045
		1387062_a_at	CHK1 checkpoint homolog (S. pombe)	1.5894
		1369010_at	CHK2 checkpoint homolog (S. pombe)	1.50825
		1382783_at	Bloom syndrome homolog (human)	1.35701
		Hereditary Breast Cancer Signaling
		1378240_at	Fanconi anemia, complementation group D2	1.75799
		1377718_at	Fanconi anemia, complementation group B	1.59045
		1387062_a_at	CHK1 checkpoint homolog (S. pombe)	1.5894
		1369010_at	CHK2 checkpoint homolog (S. pombe)	1.50825
		1382783_at	Bloom syndrome homolog (human)	1.35701
		1387678_at	neuroblastoma ras oncogene	1.27755
		1382264_at	CREB binding protein	-1.22635
		1371819_at	histone deacetylase 5	-1.3747

## Sheet: Supp. Table 6
SCI14d+TM vs SCI14d		Affimetrix Accession No.	Gene description	Fold change
		Eostrogen Receptor Signaling
		1372415_at	general transcription factor IIH, polypeptide 3	1.33736
		1383718_at	C-terminal binding protein 2	1.26628
		1367769_at	polymerase (RNA) II (DNA directed) polypeptide G	1.17195
		1398899_at	polymerase (RNA) II (DNA directed) polypeptide C, 33kDa	1.15763
		1371718_at	steroid receptor RNA activator 1	1.14154
		1388171_at	cyclin-dependent kinase 7	-1.10153
		1374409_at	TAF6-like RNA polymerase II, p300/CBP-associated factor (PCAF)-associated factor	-1.12837
		1391474_at	mediator complex subunit 14	-1.24028
		1386944_a_at	glucose-6-phosphatase, catalytic subunit	-1.28565
		1373632_at	TAF9 RNA polymerase II, TATA box binding protein (TBP)-associated factor	-1.32812
		EIF2 Signaling
		1373040_at	eukaryotic translation initiation factor 3, subunit F	1.21955
		1386863_at	protein phosphatase 1, catalytic subunit, alpha isoform	1.17214
		1375249_at	eukaryotic translation initiation factor 2C, 1	1.13871
		1388568_at	eukaryotic translation initiation factor 3, subunit D	-1.10488
		1368967_at	eukaryotic translation initiation factor 2B, subunit 3 gamma	-1.14876
		1387272_at	eukaryotic translation initiation factor 2 alpha kinase 1	-1.19001
		1397697_at	Eukaryotic translation initiation factor 4A2	-1.29403
		1379272_at	Poly(A) binding protein interacting protein 1	-2.05149
		Regulation of eIF4 and p70S6K
		1398790_at	protein phosphatase 2 (formerly 2A), catalytic subunit, alpha isoform	1.37048
		1373040_at	eukaryotic translation initiation factor 3, subunit F	1.21955
		1372331_at	eukaryotic translation initiation factor 1A, Y-linked	1.16588
		1375249_at	eukaryotic translation initiation factor 2C, 1	1.13871
		1388568_at	eukaryotic translation initiation factor 3, subunit D	-1.10488
		1368967_at	eukaryotic translation initiation factor 2B, subunit 3 gamma	-1.14876
		1397697_at	Eukaryotic translation initiation factor 4A2	-1.29403
		1367827_at	protein phosphatase 2 (formerly 2A), catalytic subunit, beta isoform	-1.30018
		1379272_at	Poly(A) binding protein interacting protein 1	-2.05149
		Glutamate Metabolism
		1374523_at	6-phosphogluconolactonase	1.29575
		1369061_at	glutathione reductase	1.24064
		1370030_at	glutamate cysteine ligase, modifier subunit	-1.29585
		1377314_at	glutamine fructose-6-phosphate transaminase 1	-1.48349
		Granzyme B Signaling
		1389195_at	DNA fragmentation factor, alpha subunit	1.79059
		1368811_at	lamin B1	-1.40193
		1369197_at	apoptotic peptidase activating factor 1	-1.40372
